## RESEARCH ARTICLE

# Maternal infections in pregnancy and the risk of sudden unexpected infant death in the offspring in the U.S., 2011–2015

Maggie Weatherly<sup>1</sup>, Anusua Trivedi<sup>2</sup>, Ratna Chembrolu<sup>1</sup>, Sanjana Gupta<sup>1</sup>, Jan-Marino Ramirez<sup>3</sup>, Juan M. Lavista Ferres<sup>2</sup>, Tatiana M. Anderson<sup>2</sup>, Edwin A. Mitchell<sup>4\*</sup>

**1** Master of Science in Data Science, University of Washington, Seattle, Washington, United States of America, **2** AI for Good Lab, Microsoft, Redmond, Washington, United States of America, **3** Seattle Children's Research Institute, Center for Integrative Brain Research, Seattle, Washington, United States of America, **4** Department of Paediatrics, Child and Youth Health, The University of Auckland, Auckland, New Zealand

\* [e.mitchell@auckland.ac.nz](mailto:e.mitchell@auckland.ac.nz)

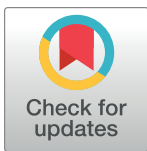

## OPEN ACCESS

**Citation:** Weatherly M, Trivedi A, Chembrolu R, Gupta S, Ramirez J-M, Lavista Ferres JM, et al. (2023) Maternal infections in pregnancy and the risk of sudden unexpected infant death in the offspring in the U.S., 2011–2015. PLoS ONE 18(4): e0284614. <https://doi.org/10.1371/journal.pone.0284614>

**Editor:** Kazumichi Fujioka, Kobe University Graduate School of Medicine School of Medicine, JAPAN

**Received:** October 4, 2022

**Accepted:** April 5, 2023

**Published:** April 21, 2023

**Copyright:** © 2023 Weatherly et al. This is an open access article distributed under the terms of the [Creative Commons Attribution License](https://creativecommons.org/licenses/by/4.0/), which permits unrestricted use, distribution, and reproduction in any medium, provided the original author and source are credited.

**Data Availability Statement:** The data were sourced from the publicly available Centers for Disease Control and Prevention (CDC) Birth Cohort Linked Birth-Infant Death Data Files [13]. The Public Use Data File Documentation is available from [https://ftp.cdc.gov/pub/Health\\_Statistics/NCHS/Dataset\\_Documentation/DVS/cohortlinked/LinkCO15Guide.pdf](https://ftp.cdc.gov/pub/Health_Statistics/NCHS/Dataset_Documentation/DVS/cohortlinked/LinkCO15Guide.pdf). The minimal data set underlying the results described in this paper are

## Abstract

### Background

Infection is thought to play a part in some infant deaths. Maternal infection in pregnancy has focused on chlamydia with some reports suggesting an association with sudden unexpected infant death (SUID).

### Objectives

We hypothesized that maternal infections in pregnancy are associated with subsequent SUID in their offspring.

### Setting

All births in the United States, 2011–2015

### Data source

Centers for Disease Control and Prevention (CDC) Birth Cohort Linked Birth-Infant Death Data Files.

### Study design

Cohort study, although the data were analysed as a case control study. Cases were infants that died from SUID. Controls were randomly sampled infants that survived their first year of life; approximately 10 controls per SUID case.

### Exposures

Chlamydia, gonorrhoea and hepatitis C.

available in Supplementary information as a Zip comma separated values (cvs) file ([S1 Dataset](#)).

**Funding:** This work was supported by the National Institutes of Health (grant numbers P01HL0906654 and R01HL126523 awarded to J. M.R.), and by the Aaron Matthew SIDS Research Guild. The funders had no role in study design, data collection and analysis, decision to publish, or preparation of the manuscript.

**Competing interests:** The authors have declared that no competing interests exist.

## Results

There were 19,849,690 live births in the U.S. for the period 2011–2015. There were 37,143 infant deaths of which 17,398 were classified as SUID cases (a rate of 0.86/1000 live births). The proportion of the control mothers with chlamydia was 1.7%, gonorrhea 0.2% and hepatitis C was 0.3%. Chlamydia was present in 3.8% of mothers whose infants subsequently died of SUID compared with 1.7% of controls (unadjusted OR = 2.35, 95% CI = 2.15, 2.56; adjusted OR = 1.08, 95% CI = 0.98, 1.19). Gonorrhea was present in 0.7% of mothers of SUID cases compared with 0.2% of mothers of controls (OR = 3.09, (2.50, 3.79); aOR = 1.20(0.95, 1.49)) and hepatitis C was present in 1.3% of mothers of SUID cases compared with 0.3% of mothers of controls (OR = 4.69 (3.97, 5.52); aOR = 1.80 (1.50, 2.15)).

## Conclusions

The marked attenuation of SUID risk after adjustment for a wide variety of socioeconomic and demographic factors suggests the small increase in the risk of SUID of the offspring of mothers with infection with hepatitis C in pregnancy is due to residual confounding.

## Introduction

In the United States (U.S.), sudden unexpected infant death (SUID) is a term that encompasses three separate causes of infant death as defined in the *International Classification of Diseases, 10<sup>th</sup> Revision* (ICD-10): sudden infant death syndrome (SIDS; R95), deaths from other ill-defined or unknown causes (R99), and accidental suffocation and strangulation in bed (W75). Approximately 3,500 infant deaths are classified as SUID cases annually in the U.S. [1].

As early as the 1960's, researchers have suspected a role of infections in sudden infant death [2]. This association is consistent with the seasonality of SUID, with a greater prevalence in the winter [3], and the fact that the age of death peaks around 3 months, when infants are losing maternal immunity and their own immune system is immature [4].

Studies that have specifically investigated a link between sudden infant death and sexually transmitted infections have overwhelmingly focused on chlamydia. *Chlamydia trachomatis* is the most common bacterial pathogen of sexually transmitted infections in women in the U.S. with a prevalence in pregnant women ranging from 2–20% depending on the risk factors for the population in a given study [5]. Transmission of the infection can pass to the newborn from an infected cervix during birth. A published abstract from 1981 found significantly higher seropositivity for *Chlamydia trachomatis* in SIDS infants compared to controls [6]. Maternal seropositivity is associated with stillbirths, preterm delivery, premature rupture of the membranes, and low birthweight [7–10]. Another study found chlamydia inclusions in lung sections in 19% of SIDS cases compared with 3% of infants with a known cause of death [11].

The relationship between SUID and maternal sexually transmitted diseases and other infections is likely understudied because, individually, each is a rare occurrence, so it takes a very large dataset to have the necessary statistical power. Here we used the Centers for Disease Control and Prevention (CDC) Birth Cohort Linked Birth/Infant Death Data Set that includes every birth and death in the United States to study the association between SUID and various maternal infections in pregnancy, including chlamydia, gonorrhea and hepatitis C. We

hypothesized that these maternal infections in pregnancy are associated with subsequent SUID in their offspring.

## Methods

### Study design

The study design is a population-based cohort study of all births and their mothers occurring in the U.S. from 2011 to 2015. Due to the very large sample size, infants that survived their first year of life (referred to as controls) were randomly sampled so there were approximately 10 controls for each SUID. The data were analysed as a case control study. Reporting of this study follows the STROBE (Strengthening the Reporting of Observational Studies in Epidemiology) guidelines [12].

### Data source

The cohort data were sourced from the publicly available Centers for Disease Control and Prevention (CDC) Birth Cohort Linked Birth-Infant Death Data Files [13]. Each contained several hundreds of features detailing various aspects of the mother's and father's background, the pregnancy and the birth of the infant. Additionally, the data includes details concerning the death of any infant in the first year of life.

### Exposure variable

The following maternal infections in pregnancy were examined: chlamydia, hepatitis C, hepatitis B, gonorrhoea and syphilis. These are reported as Yes, No, Unknown or not stated.

### Outcome—SUID

Infants who died under 1 year of age and whose cause of death were certified as due to any one of the following International Classification of Diseases, 10th Revision (ICD10) codes:

R95 (sudden infant death syndrome, SIDS), R99 (other ill-defined and unspecified cause of mortality) or W75 (accidental suffocation and strangulation in bed). Deaths that occurred in infant's first 7 days of life were excluded as the epidemiology is different from those dying between 7 and 365 days of life [14].

### Covariates

The analysis adjusted for the following variables, which are known to be associated with SUDI [15,16] and were in the linked dataset: mother's age, mother's education, mother's race/Hispanic origin, marital status, smoking before pregnancy, smoking during pregnancy, delivery method, gestational age, sex of infant, father's age, father's race/Hispanic origin, live birth order, month prenatal care began and birthweight. The definition, origin and categorisation of these variables were:

- Mother's Age [MAGER9]: <15, 15–19, 20–24, 25–29, 30–34, 35–39, 40–44, 45–49, 50–54 years
- Mother's Education [MEDUC]: 8th grade or less, 9th through 12th grade with no diploma, high school graduate or GED completed, Some college credit, but not a degree, associate degree, bachelor's degree, master's degree, doctorate or professional degree, unknown

- Mother's Race/Hispanic Origin [MRACEHISP]: Non-Hispanic White, Non-Hispanic Black, Non-Hispanic AIAN, Non-Hispanic Asian, Non-Hispanic NHOPI, Non-Hispanic more than one race, Hispanic, unknown or not stated
- Marital Status [DMAR]: Married, unmarried, unknown
- Smoking Before Pregnancy [CIG\_0]: Number of cigarettes daily, categorized Yes, No, unknown or not stated
- Smoking During Pregnancy [CIG\_1 (1<sup>st</sup> trimester) or CIG\_2 (2<sup>nd</sup> trimester) or CIG\_3 (3<sup>rd</sup> trimester)]: Number of cigarettes daily, categorized Yes, No, unknown or not stated
- Delivery Method [DMETH\_REC]: Vaginal, C-section, unknown
- Gestational age [GESTREC10]: <20 (observation deleted), 20–27, 28–31, 32–33, 34–36, 37–38, 39, 40, 41, 42 and over, unknown
- Sex of Infant [SEX]: Male, Female
- Admission to the neonatal intensive care unit [AB\_NICU]: Yes, No, unknown or not stated
- Father's Age [FAGE11]: <15, 15–19, 20–24, 25–29, 30–34, 35–39, 40–44, 45–49, 50–54, 55 + years, not stated
- Father's Race/Hispanic Origin [FRACEHISP]: Non-Hispanic White, Non-Hispanic Black, Non-Hispanic AIAN, Non-Hispanic Asian, Non-Hispanic NHOPI, Non-Hispanic more than one race, Hispanic, unknown or not stated
- Live birth order [LBO\_REC]: 1–7, 8+, unknown or not stated
- Month prenatal care began [PRECARE5]: 1st to 3rd month, 4th to 6th month, 7th to final month, No prenatal care, unknown or not stated
- Birth weight [BWTR14]: birthweight (g) 227–499, 500–749, 750–999, 1000–1249, 05 1250–1499, 1500–1999, 2000–2499, 2500–2999, 3000–3499, 3500–3999, 4000–4499, 4500–4999, 5000+, not stated

## Statistical analysis

Relative risks were estimated by calculation of odds ratios (OR). The univariable and multivariable ORs were obtained from unconditional logistic regression modelling as were their confidence intervals (CI). Population attributable risks (PAR) were calculated to estimate the unadjusted proportion of deaths explained by exposure to maternal infections [17].

## Results

There were 19,849,710 live births in the U.S. for the period 2011–2015. The flow diagram of the cases and controls (infants that lived through to the first birthday) is shown in Fig 1.

### Cases

There were 37,143 infant deaths of which 17,398 were classified as SUID cases (a rate of 0.88/1000 live births). Of the SUID cases 619 occurred in the first week of life. Thus 16,779 SUID cases (96.4% of all SUID cases) were included in this analysis.

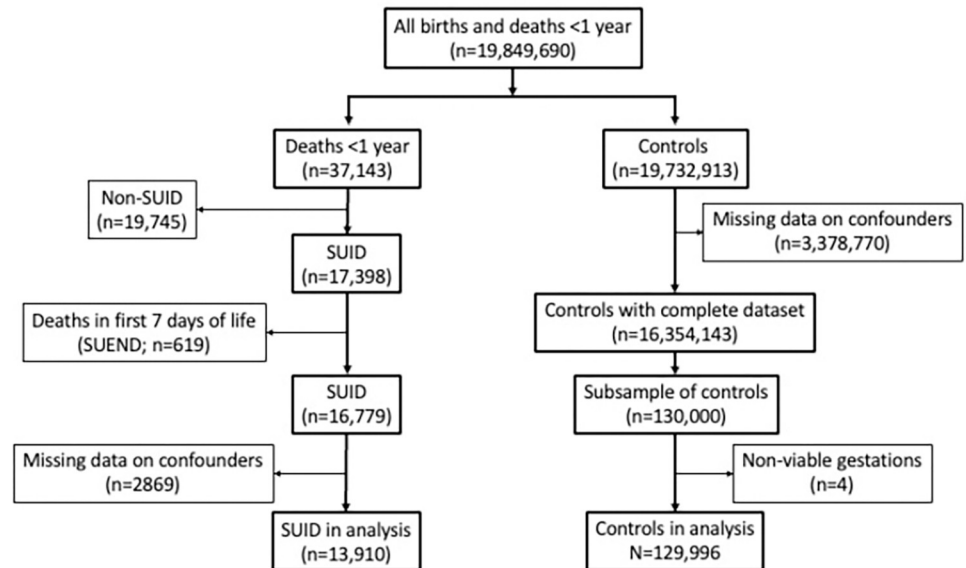

**Fig 1. Flow diagram of SUDI cases and controls (infants that lived through to the first birthday and reasons for exclusions).**

<https://doi.org/10.1371/journal.pone.0284614.g001>

## Controls

Of the 19,732,933 infants born in the study period that survived to their first birthday a sample of 166,985 infants were randomly selected so that there was approximately 10 controls for each SUID case) This sample was used in this analysis.

[Table 1](#) describes the characteristics of the study population (cases and controls).

The proportion of the controls with chlamydia was 1.7%, gonorrhea 0.2% and hepatitis C was 0.3%. Due to small numbers, syphilis and hepatitis B were not considered further. [Table 2](#) shows the characteristics of the exposures (chlamydia, gonorrhea, and hepatitis C).

Chlamydia was present in 3.8% of mothers whose infants subsequently died of SUID compared with 1.7% of mothers whose infants who did not die (unadjusted OR = 2.35, 95% CI = 2.15, 2.56 and adjusted OR = 1.08, 95% CI = 0.98, 1.19; [Table 3](#)).

Gonorrhea was present in 0.7% of mothers of SUID cases compared with 0.2% of mothers of controls (unadjusted OR = 3.09, 95% CI = 2.50, 3.79 and adjusted OR = 1.20, 95% CI = 0.95, 1.49) and hepatitis C was present in 1.3% of mothers of SUID cases compared with 0.3% of mothers of controls (unadjusted OR = 4.69, 95% CI = 3.97, 5.52 and adjusted OR = 1.80, 95% CI = 1.50, 2.15).

[Table 4](#) shows the adjusted covariates for chlamydia. The covariates for gonorrhea and hepatitis C are similar (not shown).

The population attributable fractions for chlamydia, gonorrhea and hepatitis C are 2.2%, 0.5% and 1.0% respectively.

## Discussion

This study found that maternal infection with chlamydia, gonorrhea and hepatitis C during pregnancy was associated with an increased risk of SUID in the offspring. After adjustment for a wide range of sociodemographic and other risk factors for SUID, the magnitude of the risk was attenuated, but remained statistically significant for hepatitis C.

**Table 1. The study population: 16,779 SUID cases and 166,985 controls, which were randomly sampled so that there were approximately 10 controls for each SUID case). Controls were infants that survived to first birthday.**

|                                        | Cases (N = 16779) |      | Controls (N = 166985) |      |
|----------------------------------------|-------------------|------|-----------------------|------|
|                                        | N                 | %    | N                     | %    |
| <b>Mother's Age</b>                    |                   |      |                       |      |
| <15                                    | 32                | 0.2  | 109                   | 0.1  |
| 15–19                                  | 2,205             | 13.1 | 11,628                | 7.0  |
| 20–24                                  | 6,236             | 37.2 | 37,503                | 22.5 |
| 25–29                                  | 4,644             | 27.7 | 47,758                | 28.6 |
| 30–34                                  | 2,538             | 15.1 | 44,065                | 26.4 |
| 35–39                                  | 903               | 5.4  | 20,850                | 12.5 |
| 40–45                                  | 210               | 1.3  | 4,732                 | 2.8  |
| 45–49                                  | 10                | 0.1  | 319                   | 0.2  |
| 50–54                                  | 1                 | 0.0  | 21                    | 0.0  |
| <b>Mother's Education</b>              |                   |      |                       |      |
| 8th grade or less                      | 412               | 2.5  | 5,951                 | 3.6  |
| 9th through 12th grade with no diploma | 3,696             | 22.0 | 18,203                | 10.9 |
| High school graduate or GED completed  | 5,566             | 33.2 | 37,933                | 22.7 |
| Some college credit, but not a degree  | 3,572             | 21.3 | 32,152                | 19.3 |
| Associate degree                       | 762               | 4.5  | 12,263                | 7.3  |
| Bachelor's degree                      | 851               | 5.1  | 28,933                | 17.3 |
| Master's degree                        | 279               | 1.7  | 12,729                | 7.6  |
| Doctorate or Professional Degree       | 71                | 0.4  | 3,547                 | 2.1  |
| Unknown                                | 1,570             | 9.4  | 15,274                | 9.1  |
| <b>Mother's Race/Hispanic Origin</b>   |                   |      |                       |      |
| Non-Hispanic White                     | 7,742             | 46.1 | 82,374                | 49.3 |
| Non-Hispanic Black                     | 4,417             | 26.3 | 21,952                | 13.1 |
| Non-Hispanic AIAN                      | 300               | 1.8  | 5,764                 | 3.5  |
| Non-Hispanic Asian                     | 281               | 1.7  | 4,631                 | 2.8  |
| Non-Hispanic NHOPI                     | 60                | 0.4  | 364                   | 0.2  |
| Non-Hispanic more than one race        | 264               | 1.6  | 1,682                 | 1.0  |
| Hispanic                               | 2,209             | 13.2 | 37,845                | 22.7 |
| Origin unknown or not stated           | 1,506             | 9.0  | 12,373                | 7.4  |
| <b>Marital Status</b>                  |                   |      |                       |      |
| Married                                | 5,220             | 31.1 | 99,786                | 59.8 |
| Unmarried                              | 11,559            | 68.9 | 67,199                | 40.2 |
| <b>Smoking Before Pregnancy</b>        |                   |      |                       |      |
| No                                     | 9,528             | 56.8 | 131,001               | 78.5 |
| Yes                                    | 6,472             | 38.6 | 29,864                | 17.9 |
| Unknown                                | 779               | 4.6  | 6,120                 | 3.7  |
| <b>Smoking During Pregnancy</b>        |                   |      |                       |      |
| No                                     | 10,046            | 59.9 | 134,730               | 80.7 |
| Yes                                    | 5,950             | 35.5 | 26,123                | 15.6 |
| Unknown                                | 783               | 4.7  | 6,132                 | 3.7  |
| <b>Delivery Method</b>                 |                   |      |                       |      |
| Vaginal                                | 10,907            | 65.0 | 112,527               | 67.4 |
| Cesarean                               | 5,852             | 34.9 | 54,270                | 32.5 |
| Unknown                                | 20                | 0.1  | 188                   | 0.1  |
| <b>Gestational age</b>                 |                   |      |                       |      |

(Continued)

**Table 1.** (Continued)

|                                           | Cases (N = 16779) |      | Controls (N = 166985) |      |
|-------------------------------------------|-------------------|------|-----------------------|------|
|                                           | N                 | %    | N                     | %    |
| <27 weeks                                 | 243               | 1.4  | 797                   | 0.5  |
| 28–31 weeks                               | 571               | 3.4  | 1,893                 | 1.1  |
| 32–33 weeks                               | 578               | 3.4  | 2,462                 | 1.5  |
| 34–36 weeks                               | 2,417             | 14.4 | 13,446                | 8.1  |
| 37–38 weeks                               | 4,464             | 26.6 | 41,663                | 25.0 |
| 39 weeks                                  | 4,095             | 24.4 | 50,065                | 30.0 |
| 40 weeks                                  | 2,380             | 14.2 | 33,059                | 19.8 |
| 41 weeks                                  | 1,041             | 6.2  | 14,217                | 8.5  |
| 42 weeks and over                         | 958               | 5.7  | 9,228                 | 5.5  |
| Unknown                                   | 32                | 0.2  | 155                   | 0.1  |
| <b>Sex of Infant</b>                      |                   |      |                       |      |
| Male                                      | 9,844             | 58.7 | 85,543                | 51.2 |
| Female                                    | 6,935             | 41.3 | 81,442                | 48.8 |
| <b>Admission to NICU</b>                  |                   |      |                       |      |
| No                                        | 12,898            | 76.9 | 140,866               | 84.4 |
| Yes                                       | 2,411             | 14.4 | 12,129                | 7.3  |
| Unknown                                   | 1,470             | 8.8  | 13,990                | 8.4  |
| <b>Father's Age</b>                       |                   |      |                       |      |
| <15                                       | 2                 | 0.0  | 10                    | 0.0  |
| 15–19                                     | 682               | 4.1  | 3,955                 | 2.4  |
| 20–24                                     | 3,219             | 19.2 | 21,350                | 12.8 |
| 25–29                                     | 3,320             | 19.8 | 36,534                | 21.9 |
| 30–34                                     | 2,414             | 14.4 | 42,153                | 25.2 |
| 35–39                                     | 1,172             | 7.0  | 25,791                | 15.4 |
| 40–45                                     | 529               | 3.2  | 10,906                | 6.5  |
| 45–49                                     | 218               | 1.3  | 3,674                 | 2.2  |
| 50–54                                     | 88                | 0.5  | 1,177                 | 0.7  |
| 55+                                       | 44                | 0.3  | 485                   | 0.3  |
| Unknown                                   | 5,091             | 30.3 | 20,950                | 12.5 |
| <b>Father's Race/Hispanic Origin</b>      |                   |      |                       |      |
| Non-Hispanic White                        | 5,382             | 32.1 | 72,741                | 43.6 |
| Non-Hispanic Black                        | 2,776             | 16.5 | 16,862                | 10.1 |
| Non-Hispanic AIAN                         | 204               | 1.2  | 4,919                 | 2.9  |
| Non-Hispanic Asian                        | 186               | 1.1  | 3,820                 | 2.3  |
| Non-Hispanic NHOPI                        | 44                | 0.3  | 322                   | 0.2  |
| Non-Hispanic more than one race           | 286               | 1.7  | 2,734                 | 1.6  |
| Hispanic                                  | 1,748             | 10.4 | 33,030                | 19.8 |
| Origin unknown or not stated              | 5,971             | 35.6 | 30,411                | 18.2 |
| Race unknown or not stated (Non-Hispanic) | 182               | 1.1  | 2,146                 | 1.3  |
| <b>Live Birth Order</b>                   |                   |      |                       |      |
| 1                                         | 4,565             | 27.2 | 65,450                | 39.2 |
| 2                                         | 5,194             | 31.0 | 52,895                | 31.7 |
| 3                                         | 3,524             | 21.0 | 27,736                | 16.6 |
| 4                                         | 1,753             | 10.4 | 11,752                | 7.0  |
| 5                                         | 833               | 5.0  | 4,636                 | 2.8  |
| 6                                         | 410               | 2.4  | 1,876                 | 1.1  |

(Continued)

Table 1. (Continued)

|                                  | Cases (N = 16779) |      | Controls (N = 166985) |      |
|----------------------------------|-------------------|------|-----------------------|------|
|                                  | N                 | %    | N                     | %    |
| 7                                | 180               | 1.1  | 848                   | 0.5  |
| 8+                               | 204               | 1.2  | 881                   | 0.5  |
| Unknown                          | 116               | 0.7  | 911                   | 0.5  |
| <b>Month Prenatal Care Began</b> |                   |      |                       |      |
| 1st to 3rd month                 | 8,596             | 51.2 | 111,485               | 66.8 |
| 4th to 6th month                 | 4,168             | 24.8 | 27,615                | 16.5 |
| 7th to final month               | 1,182             | 7.0  | 6,543                 | 3.9  |
| No prenatal care                 | 606               | 3.6  | 2,172                 | 1.3  |
| Unknown or not stated            | 2,227             | 13.3 | 19,170                | 11.5 |
| <b>Birth Weight (g)</b>          |                   |      |                       |      |
| <500                             | 5                 | 0.0  | 30                    | 0.0  |
| 500–749                          | 82                | 0.5  | 279                   | 0.2  |
| 750–999                          | 132               | 0.8  | 394                   | 0.2  |
| 1000–1249                        | 166               | 1.0  | 496                   | 0.3  |
| 1250–1499                        | 226               | 1.3  | 668                   | 0.4  |
| 1500–1999                        | 792               | 4.7  | 2,647                 | 1.6  |
| 2000–2499                        | 1,919             | 11.4 | 8,472                 | 5.1  |
| 2500–2999                        | 4,252             | 25.3 | 30,486                | 18.3 |
| 3000–3499                        | 5,671             | 33.8 | 64,974                | 38.9 |
| 3500–3999                        | 2,794             | 16.7 | 44,976                | 26.9 |
| 4000–4499                        | 617               | 3.7  | 11,691                | 7.0  |
| 4500–4999                        | 96                | 0.6  | 1,644                 | 1.0  |
| 5000+                            | 18                | 0.1  | 189                   | 0.1  |
| Not Stated                       | 9                 | 0.1  | 39                    | 0.0  |

<https://doi.org/10.1371/journal.pone.0284614.t001>

Some infections, for example syphilis and HIV (human immunodeficiency virus), can pass across the placenta and infect the fetus in utero. Other sexually transmitted diseases, like gonorrhea, chlamydia, hepatitis B, and genital herpes, can pass from the mother to the baby as the baby passes through the genital tract. Our analysis adjusted for mode of delivery. A meta-analysis found that cesarean delivery did not decrease the risk of perinatal transmission of hepatitis C virus from positive mothers [18]. One possible explanation is that vaginal birth does not simply increase the risk of transmitted infections, but it may also convey increased protection against infections, for example through the gut microbiome. There is increasing evidence that infants born by Cesarean delivery lack bacteria that are important for the stabilization of the gut microbiota [19]. Clearly, our study cannot provide insights into causal relationships. The most likely explanation for our findings is residual confounding.

This study has shown that these maternal infections in pregnancy are associated with young maternal age, less maternal education, unmarried, Hispanic and Black race, and maternal smoking both before and during pregnancy. All these factors are also known risk factors for SUID. We speculate that this may account for previous findings of a higher seropositivity for chlamydia<sup>6</sup> and greater frequency of chlamydia inclusions in the lungs of SUID cases [11].

Limitations of this study must be considered. The prevalence of these infections is at the lower limits of that reported from other studies, which may reflect those other studies were conducted for more selected and higher risk populations. In contrast this study was unbiased as it considered the entire population of births in the U.S. over 5 years. The infections



Table 2. Characteristics of the exposures: Chlamydia (N = 3403), Gonorrhea (N = 502) and Hepatitis C (N = 663).

|                                        | Chlamydia (N = 3403) |      | Gonorrhoea (N = 502) |      | Hepatitis C (N = 663) |      |
|----------------------------------------|----------------------|------|----------------------|------|-----------------------|------|
|                                        | N                    | %    | N                    | %    | N                     | %    |
| <b>Mother's Age</b>                    |                      |      |                      |      |                       |      |
| <15                                    | 10                   | 0.3  | 2                    | 0.4  | 0                     | 0.0  |
| 15–19                                  | 797                  | 23.4 | 120                  | 23.9 | 17                    | 2.6  |
| 20–24                                  | 1587                 | 46.6 | 215                  | 42.8 | 163                   | 24.6 |
| 25–29                                  | 677                  | 19.9 | 106                  | 21.1 | 250                   | 37.7 |
| 30–34                                  | 259                  | 7.6  | 49                   | 9.8  | 163                   | 24.6 |
| 35–39                                  | 64                   | 1.9  | 9                    | 1.8  | 56                    | 8.4  |
| 40–45                                  | 9                    | 0.3  | 1                    | 0.2  | 14                    | 2.1  |
| 45–49                                  | 0                    | 0.0  | 0                    | 0.0  | 0                     | 0.0  |
| 50–54                                  | 0                    | 0.0  | 0                    | 0.0  | 0                     | 0.0  |
| <b>Mother's Education</b>              |                      |      |                      |      |                       |      |
| 8th grade or less                      | 119                  | 3.5  | 12                   | 2.4  | 21                    | 3.2  |
| 9th through 12th grade with no diploma | 934                  | 27.4 | 161                  | 32.1 | 146                   | 22.0 |
| High school graduate or GED completed  | 1353                 | 39.8 | 196                  | 39.0 | 268                   | 40.4 |
| Some college credit, but not a degree  | 711                  | 20.9 | 97                   | 19.3 | 159                   | 24.0 |
| Associate degree                       | 126                  | 3.7  | 17                   | 3.4  | 29                    | 4.4  |
| Bachelor's degree                      | 105                  | 3.1  | 14                   | 2.8  | 21                    | 3.2  |
| Master's degree                        | 20                   | 0.6  | 1                    | 0.2  | 5                     | 0.8  |
| Doctorate or Professional Degree       | 3                    | 0.1  | 0                    | 0.0  | 0                     | 0.0  |
| Unknown                                | 32                   | 0.9  | 4                    | 0.8  | 14                    | 2.1  |
| <b>Mother's Race/Hispanic Origin</b>   |                      |      |                      |      |                       |      |
| Non-Hispanic White                     | 1142                 | 33.6 | 116                  | 23.1 | 515                   | 77.7 |
| Non-Hispanic Black                     | 1261                 | 37.1 | 280                  | 55.8 | 43                    | 6.5  |
| Non-Hispanic AIAN                      | 55                   | 1.6  | 9                    | 1.8  | 12                    | 1.8  |
| Non-Hispanic Asian                     | 62                   | 1.8  | 5                    | 1.0  | 14                    | 2.1  |
| Non-Hispanic NHOPI                     | 16                   | 0.5  | 0                    | 0.0  | 0                     | 0.0  |
| Non-Hispanic more than one race        | 60                   | 1.8  | 13                   | 2.6  | 10                    | 1.5  |
| Hispanic                               | 733                  | 21.5 | 66                   | 13.1 | 61                    | 9.2  |
| Origin unknown or not stated           | 74                   | 2.2  | 13                   | 2.6  | 8                     | 1.2  |
| <b>Marital Status</b>                  |                      |      |                      |      |                       |      |
| Married                                | 534                  | 15.7 | 62                   | 12.4 | 151                   | 22.8 |
| Unmarried                              | 2869                 | 84.3 | 440                  | 87.6 | 512                   | 77.2 |
| <b>Smoking Before Pregnancy</b>        |                      |      |                      |      |                       |      |
| No                                     | 2449                 | 72.0 | 341                  | 67.9 | 241                   | 36.3 |
| Yes                                    | 822                  | 24.2 | 142                  | 28.3 | 395                   | 59.6 |
| Unknown                                | 132                  | 3.9  | 19                   | 3.8  | 27                    | 4.1  |
| <b>Smoking During Pregnancy</b>        |                      |      |                      |      |                       |      |
| No                                     | 2580                 | 75.8 | 354                  | 70.5 | 248                   | 37.4 |
| Yes                                    | 694                  | 20.4 | 127                  | 25.3 | 388                   | 58.5 |
| Unknown                                | 129                  | 3.8  | 21                   | 4.2  | 27                    | 4.1  |
| <b>Delivery Method</b>                 |                      |      |                      |      |                       |      |
| Vaginal                                | 2470                 | 72.6 | 340                  | 67.7 | 438                   | 66.1 |
| Cesarean                               | 933                  | 27.4 | 162                  | 32.3 | 225                   | 33.9 |
| Unknown                                | 0                    | 0.0  | 0                    | 0.0  | 0                     | 0.0  |
| <b>Gestational age</b>                 |                      |      |                      |      |                       |      |
| <27 weeks                              | 23                   | 1    | 3                    | 1    | 5                     | 1    |
| 28–31 weeks                            | 70                   | 2.1  | 14                   | 2.8  | 13                    | 2.0  |

(Continued)

Table 2. (Continued)

|                                           | Chlamydia (N = 3403) |      | Gonorrhoea (N = 502) |      | Hepatitis C (N = 663) |      |
|-------------------------------------------|----------------------|------|----------------------|------|-----------------------|------|
| 32–33 weeks                               | 69                   | 2.0  | 8                    | 1.6  | 19                    | 2.9  |
| 34–36 weeks                               | 353                  | 10.4 | 60                   | 12.0 | 86                    | 13.0 |
| 37–38 weeks                               | 877                  | 25.8 | 133                  | 26.5 | 178                   | 26.8 |
| 39 weeks                                  | 875                  | 25.7 | 115                  | 22.9 | 171                   | 25.8 |
| 40 weeks                                  | 643                  | 18.9 | 94                   | 18.7 | 87                    | 13.1 |
| 41 weeks                                  | 274                  | 8.1  | 44                   | 8.8  | 49                    | 7.4  |
| 42 weeks and over                         | 218                  | 6.4  | 31                   | 6.2  | 54                    | 8.1  |
| Unknown                                   | 1                    | 0.0  | 0                    | 0.0  | 1                     | 0.2  |
| <b>Sex of Infant</b>                      |                      |      |                      |      |                       |      |
| Male                                      | 1754                 | 51.5 | 250                  | 49.8 | 368                   | 55.5 |
| Female                                    | 1649                 | 48.5 | 252                  | 50.2 | 295                   | 44.5 |
| <b>Admission to NICU</b>                  |                      |      |                      |      |                       |      |
| No                                        | 3043                 | 89.4 | 434                  | 86.5 | 522                   | 78.7 |
| Yes                                       | 356                  | 10.5 | 68                   | 13.5 | 141                   | 21.3 |
| Unknown                                   | 4                    | 0.1  | 0                    | 0.0  | 0                     | 0.0  |
| <b>Father's Age</b>                       |                      |      |                      |      |                       |      |
| <15                                       | 0                    | 0.0  | 0                    | 0.0  | 0                     | 0.0  |
| 15–19                                     | 210                  | 6.2  | 26                   | 5.2  | 7                     | 1.1  |
| 20–24                                     | 820                  | 24.1 | 96                   | 19.1 | 66                    | 10.0 |
| 25–29                                     | 575                  | 16.9 | 69                   | 13.7 | 124                   | 18.7 |
| 30–34                                     | 258                  | 7.6  | 38                   | 7.6  | 106                   | 16.0 |
| 35–39                                     | 111                  | 3.3  | 20                   | 4.0  | 68                    | 10.3 |
| 40–45                                     | 42                   | 1.2  | 8                    | 1.6  | 36                    | 5.4  |
| 45–49                                     | 11                   | 0.3  | 4                    | 0.8  | 20                    | 3.0  |
| 50–54                                     | 2                    | 0.1  | 1                    | 0.2  | 6                     | 0.9  |
| 55–98                                     | 2                    | 0.1  | 1                    | 0.2  | 6                     | 0.9  |
| Unknown                                   | 1372                 | 40.3 | 239                  | 47.6 | 224                   | 33.8 |
| <b>Father's Race/Hispanic Origin</b>      |                      |      |                      |      |                       |      |
| Non-Hispanic White                        | 636                  | 18.7 | 56                   | 11.2 | 294                   | 44.3 |
| Non-Hispanic Black                        | 670                  | 19.7 | 149                  | 29.7 | 38                    | 5.7  |
| Non-Hispanic AIAN                         | 32                   | 0.9  | 5                    | 1.0  | 8                     | 1.2  |
| Non-Hispanic Asian                        | 35                   | 1.0  | 5                    | 1.0  | 8                     | 1.2  |
| Non-Hispanic NHOPI                        | 11                   | 0.3  | 0                    | 0.0  | 2                     | 0.3  |
| Non-Hispanic more than one race           | 51                   | 1.5  | 5                    | 1.0  | 7                     | 1.1  |
| Hispanic                                  | 594                  | 17.5 | 39                   | 7.8  | 58                    | 8.7  |
| Origin unknown or not stated              | 1357                 | 39.9 | 241                  | 48.0 | 242                   | 36.5 |
| Race unknown or not stated (Non-Hispanic) | 17                   | 0.5  | 2                    | 0.4  | 6                     | 0.9  |
| <b>Live Birth Order</b>                   |                      |      |                      |      |                       |      |
| 1                                         | 1534                 | 45.1 | 204                  | 40.6 | 184                   | 27.8 |
| 2                                         | 977                  | 28.7 | 142                  | 28.3 | 176                   | 26.5 |
| 3                                         | 500                  | 14.7 | 96                   | 19.1 | 138                   | 20.8 |
| 4                                         | 221                  | 6.5  | 35                   | 7.0  | 87                    | 13.1 |
| 5                                         | 85                   | 2.5  | 11                   | 2.2  | 43                    | 6.5  |
| 6                                         | 36                   | 1.1  | 6                    | 1.2  | 16                    | 2.4  |
| 7                                         | 18                   | 0.5  | 3                    | 0.6  | 7                     | 1.1  |
| 8+                                        | 14                   | 0.4  | 2                    | 0.4  | 10                    | 1.5  |
| Unknown                                   | 18                   | 0.5  | 3                    | 0.6  | 2                     | 0.3  |

(Continued)

Table 2. (Continued)

| Month Prenatal Care Began | Chlamydia (N = 3403) |      | Gonorrhoea (N = 502) |      | Hepatitis C (N = 663) |      |
|---------------------------|----------------------|------|----------------------|------|-----------------------|------|
|                           | N                    | %    | N                    | %    | N                     | %    |
| 1st to 3rd month          | 1888                 | 55.5 | 269                  | 53.6 | 339                   | 51.1 |
| 4th to 6th month          | 1067                 | 31.4 | 160                  | 31.9 | 176                   | 26.5 |
| 7th to final month        | 277                  | 8.1  | 43                   | 8.6  | 85                    | 12.8 |
| No prenatal care          | 63                   | 1.9  | 20                   | 4.0  | 27                    | 4.1  |
| Unknown or not stated     | 108                  | 3.2  | 10                   | 2.0  | 36                    | 5.4  |
| <b>Birth Weight (g)</b>   |                      |      |                      |      |                       |      |
| <500                      | 0                    | 0.0  | 0                    | 0.0  | 0                     | 0.0  |
| 500–749                   | 7                    | 0.2  | 0                    | 0.0  | 2                     | 0.3  |
| 750–999                   | 14                   | 0.4  | 3                    | 0.6  | 1                     | 0.2  |
| 1000–1249                 | 11                   | 0.3  | 2                    | 0.4  | 3                     | 0.5  |
| 1250–1499                 | 22                   | 0.6  | 3                    | 0.6  | 3                     | 0.5  |
| 1500–1999                 | 100                  | 2.9  | 21                   | 4.2  | 37                    | 5.6  |
| 2000–2499                 | 267                  | 7.8  | 48                   | 9.6  | 96                    | 14.5 |
| 2500–2999                 | 785                  | 23.1 | 122                  | 24.3 | 198                   | 29.9 |
| 3000–3499                 | 1355                 | 39.8 | 191                  | 38.0 | 211                   | 31.8 |
| 3500–3999                 | 673                  | 19.8 | 97                   | 19.3 | 98                    | 14.8 |
| 4000–4499                 | 159                  | 4.7  | 15                   | 3.0  | 12                    | 1.8  |
| 4500–4999                 | 8                    | 0.2  | 0                    | 0.0  | 2                     | 0.3  |
| 5000+                     | 2                    | 0.1  | 0                    | 0.0  | 0                     | 0.0  |
| Not Stated                | 0                    | 0.0  | 0                    | 0.0  | 0                     | 0.0  |

<https://doi.org/10.1371/journal.pone.0284614.t002>

identified within our study may reflect not only identification of the infections but also that they have been treated. The dataset does not record information on whether they have been treated. A further limitation is the missing data for the covariates, but since the loss was similar in both cases and controls for both the exposures (9.0% and 8.5% respectively) and covariates, with the exception of father's age and origin, it is unlikely to have affected the results. Father's

Table 3. Number, percentage and unadjusted and adjusted odds ratios (OR) and their 95% confidence intervals (CI) for chlamydia, gonorrhea and hepatitis C.

|                    | Case   |      | Control |      | Unadjusted |              | Adjusted * |              |
|--------------------|--------|------|---------|------|------------|--------------|------------|--------------|
|                    | N      | %    | N       | %    | OR         | (95% CI)     | OR         | (95% CI)     |
| <b>Chlamydia</b>   |        |      |         |      |            |              |            |              |
| Yes                | 634    | 3.8  | 2,769   | 1.7  | 2.35       | (2.15, 2.56) | 1.08       | (0.98, 1.19) |
| No                 | 14,643 | 87.3 | 150,046 | 89.9 | Ref        | Ref          | Ref        | Ref          |
| Unknown            | 1,502  | 9.0  | 14170   | 8.5  | 1.09       | (1.03, 1.15) | 0.73       | (0.56, 0.93) |
| <b>Gonorrhea</b>   |        |      |         |      |            |              |            |              |
| Yes                | 118    | 0.7  | 384     | 0.2  | 3.09       | (2.50, 3.79) | 1.20       | (0.95, 1.49) |
| No                 | 15,159 | 90.3 | 152,431 | 91.3 | Ref        | Ref          | Ref        | Ref          |
| Unknown            | 1,502  | 9.0  | 14170   | 8.5  | 1.07       | (1.01, 1.13) | 0.73       | (0.56, 0.93) |
| <b>Hepatitis C</b> |        |      |         |      |            |              |            |              |
| Yes                | 210    | 1.3  | 453     | 0.3  | 4.69       | (3.97, 5.52) | 1.80       | (1.50, 2.15) |
| No                 | 15,067 | 89.8 | 152362  | 91.2 | Ref        | Ref          | Ref        | Ref          |
| Unknown            | 1,502  | 9.0  | 14170   | 8.5  | 1.07       | (1.01, 1.13) | 0.73       | (0.57, 0.94) |

\* Adjusted for mother's age, mother's education, mother's race/hispanic origin, marital status, smoking before pregnancy, smoking during pregnancy, delivery method, gestational age, sex of infant, admission to neonatal intensive care unit, month prenatal care began, father's age, father's race/Hispanic origin, birth weight, and live birth order.

<https://doi.org/10.1371/journal.pone.0284614.t003>

Table 4. Adjusted covariates for chlamydia.

| Factor                                 | adjusted OR* | (95% CI)     |
|----------------------------------------|--------------|--------------|
| <b>Mother's Age</b>                    |              |              |
| <15                                    | 5.44         | (3.52, 8.20) |
| 15–19                                  | 2.60         | (2.39, 2.83) |
| 20–24                                  | 2.00         | (1.88, 2.13) |
| 25–29                                  | 1.40         | (1.33, 1.49) |
| 30–34                                  | Ref          |              |
| 35–39                                  | 0.73         | (0.68, 0.80) |
| 40–45                                  | 0.64         | (0.55, 0.75) |
| 45–49                                  | 0.44         | (0.22, 0.80) |
| 50–54                                  | 0.78         | (0.04, 3.92) |
| <b>Mother's Education</b>              |              |              |
| 8th grade or less                      | 1.17         | (1.02, 1.33) |
| 9th through 12th grade with no diploma | 1.81         | (1.65, 1.97) |
| High school graduate or GED completed  | 1.64         | (1.51, 1.78) |
| Some college credit, but not a degree  | 1.60         | (1.47, 1.73) |
| Associate degree                       | 1.31         | 1.18, 1.45   |
| Bachelor's degree                      | Ref          |              |
| Master's degree                        | 0.92         | (0.80, 1.05) |
| Doctorate or Professional Degree       | 0.92         | (0.71, 1.16) |
| Unknown                                | 1.25         | (1.04, 1.50) |
| <b>Smoking During Pregnancy</b>        |              |              |
| No                                     | Ref          |              |
| Unknown                                | 1.26         | (0.84, 1.90) |
| Yes                                    | 1.67         | (1.52, 1.84) |
| <b>Smoking Before Pregnancy</b>        |              |              |
| No                                     | Ref          |              |
| Unknown                                | 1.01         | (0.67, 1.52) |
| Yes                                    | 1.51         | (1.37, 1.65) |
| <b>Marital status</b>                  |              |              |
| Not Married                            | Ref          |              |
| Married                                | 1.49         | 1.43, 1.56   |
| <b>Admitted to NICU</b>                |              |              |
| No                                     | Ref          |              |
| Unknown                                | 0.74         | (0.56, 0.97) |
| Yes                                    | 1.16         | (1.09, 1.24) |
| <b>Gestation</b>                       |              |              |
| <27 weeks                              | 1.14         | (0.89, 1.44) |
| 28–31 weeks                            | 1.35         | (1.17, 1.55) |
| 32–33 weeks                            | 1.23         | (1.09, 1.39) |
| 34–36 weeks                            | 1.30         | (1.21, 1.40) |
| 37–38 weeks                            | 1.14         | (1.07, 1.20) |
| 39 weeks                               | 1.05         | (0.99, 1.11) |
| 40 weeks                               | Ref          |              |
| 41 weeks                               | 1.03         | (0.95, 1.11) |
| 42 weeks and over                      | 1.12         | (1.03, 1.21) |
| Unknown                                | 1.17         | (0.70, 1.87) |
| <b>Mother's Race Hispanic Origin</b>   |              |              |

(Continued)

**Table 4.** (Continued)

| <b>Factor</b>                             | <b>adjusted OR*</b> | <b>(95% CI)</b> |
|-------------------------------------------|---------------------|-----------------|
| Non-Hispanic White                        | Ref                 |                 |
| Non-Hispanic Black                        | 1.06                | (1.00, 1.12)    |
| Non-Hispanic AIAN                         | 1.00                | (0.84, 1.18)    |
| Non-Hispanic Asian                        | 0.95                | (0.81, 1.13)    |
| Non-Hispanic NHOPI                        | 1.26                | (0.88, 1.80)    |
| Non-Hispanic more than one race           | 1.16                | (1.00, 1.34)    |
| Hispanic                                  | 0.70                | (0.65, 0.76)    |
| Origin unknown or not stated              | 1.17                | (1.05, 1.30)    |
| <b>Sex</b>                                |                     |                 |
| Male                                      | Ref                 |                 |
| Female                                    | 1.42                | (1.38, 1.47)    |
| <b>Delivery Method</b>                    |                     |                 |
| Cesarean                                  | Ref                 |                 |
| Unknown                                   | 0.88                | (0.51, 1.45)    |
| Vaginal                                   | 0.90                | (0.87, 0.94)    |
| <b>Birth Weight (g)</b>                   |                     |                 |
| <500                                      | 2.24                | (0.74, 5.63)    |
| 500–749                                   | 2.33                | (1.65, 3.28)    |
| 750–999                                   | 2.63                | (1.99, 3.47)    |
| 1000–1249                                 | 2.37                | (1.88, 2.98)    |
| 1250–1499                                 | 2.34                | (1.92, 2.83)    |
| 1500–1999                                 | 2.16                | (1.93, 2.41)    |
| 2000–2499                                 | 1.86                | (1.73, 1.98)    |
| 2500–2999                                 | 1.32                | (1.26, 1.38)    |
| 3000–3499                                 | Ref                 |                 |
| 3500–3999                                 | 0.81                | (0.77, 0.85)    |
| 4000–4499                                 | 0.73                | (0.67, 0.80)    |
| 4500–4999                                 | 0.85                | (0.68, 1.04)    |
| 5000+                                     | 1.12                | (0.65, 1.81)    |
| Not Stated                                | 3.39                | (1.23, 8.93)    |
| <b>Father's Race Hispanic Origin</b>      |                     |                 |
| Non-Hispanic White                        | Ref                 |                 |
| Non-Hispanic Black                        | 1.25                | 1.17, 1.34      |
| Non-Hispanic AIAN                         | 0.79                | 0.65, 0.97      |
| Non-Hispanic Asian                        | 0.91                | 0.74, 1.11      |
| Non-Hispanic NHOPI                        | 1.13                | 0.74, 1.69      |
| Non-Hispanic more than one race           | 0.92                | 0.81, 1.06      |
| Hispanic                                  | 0.65                | 0.59, 0.71      |
| Origin unknown or not stated              | 0.92                | 0.86, 0.99      |
| Race unknown or not stated (Non-Hispanic) | 0.74                | 0.62, 0.87      |
| <b>Father's Age</b>                       |                     |                 |
| <15                                       | 1.18                | 0.16, 5.58      |
| 15–19                                     | 1.48                | 1.33, 1.66      |
| 20–24                                     | 1.34                | 1.26, 1.44      |
| 25–29                                     | 1.13                | 1.07, 1.20      |
| 30–34                                     | Ref                 |                 |
| 35–39                                     | 0.92                | 0.85, 0.99      |
| 40–45                                     | 0.96                | 0.86, 1.06      |

(Continued)

**Table 4.** (Continued)

| Factor                           | adjusted OR* | (95% CI)   |
|----------------------------------|--------------|------------|
| 45–49                            | 1.02         | 0.87, 1.19 |
| 50–54                            | 1.17         | 0.92, 1.48 |
| 55–98                            | 1.34         | 0.95, 1.86 |
| Unknown                          | 1.68         | 1.55, 1.81 |
| <b>Live Birth Order</b>          |              |            |
| 1                                | Ref          |            |
| 2                                | 1.93         | 1.84, 2.02 |
| 3                                | 2.57         | 2.43, 2.71 |
| 4                                | 3.10         | 2.89, 3.32 |
| 5                                | 3.67         | 3.34, 4.02 |
| 6                                | 4.40         | 3.87, 4.99 |
| 7                                | 4.73         | 3.93, 5.68 |
| 8                                | 5.84         | 4.87, 6.96 |
| Unknown                          | 1.93         | 1.55, 2.39 |
| <b>Month Prenatal Care Began</b> |              |            |
| 1st to 3rd month                 | Ref          |            |
| 4th to 6th month                 | 1.31         | 1.25, 1.36 |
| 7th to final month               | 1.45         | 1.35, 1.56 |
| No prenatal care                 | 1.51         | 1.36, 1.68 |
| Unknown or not stated            | 1.27         | 1.16, 1.38 |

\* Adjusted for all the variables in the table plus Chlamydia.

<https://doi.org/10.1371/journal.pone.0284614.t004>

age was unknown for 30.3% of cases and 12.5% of controls and father's origin was unknown for 35.6% and 18.4% respectively. This reflects that SUID is more common for parents that are unmarried and disadvantaged.

This study has examined chlamydia, gonorrhea and hepatitis C. There were insufficient numbers to examine syphilis and hepatitis B. Other infections, such as bacterial vaginosis and human immunodeficiency virus (HIV), are not reported in the publicly available CDC Birth Cohort Linked Birth-Infant Death Data Files. Bacterial vaginosis may be a cause of SUID as it causes preterm birth and low birthweight [20], which are established risk factors for SUID. This suggests maternal infection, especially relating to the genital tract in pregnancy should not be entirely discounted.

## Conclusions

We conclude that even if there is a causal link, the number of cases that could be attributed to these infections is small. This does not negate the fact that these infections in pregnancy are important and cause a wide range of health problems to the mother, fetus, and infant. In conclusion, even though we argue that SUID is not a direct consequence of these infections, paying a holistic assessment of the mother's health conditions and being extra vigilant on an infant during early months of birth may be beneficial.

## Supporting information

### S1 Dataset.

(ZIP)

## Author Contributions

**Conceptualization:** Juan M. Lavista Ferres.

**Data curation:** Juan M. Lavista Ferres.

**Formal analysis:** Maggie Weatherly, Anusua Trivedi, Ratna Chembrolu, Sanjana Gupta.

**Methodology:** Edwin A. Mitchell.

**Supervision:** Edwin A. Mitchell.

**Writing – original draft:** Tatiana M. Anderson, Edwin A. Mitchell.

**Writing – review & editing:** Jan-Marino Ramirez, Juan M. Lavista Ferres, Tatiana M. Anderson.

## References

1. Mathews T, MacDorman MF, Thoma ME. Infant mortality statistics from the 2013 period linked birth/ infant death data set. *Natl Vital Stat Rep.* 64(9):1–30, 2015 Aug 06. PMID: [26270610](https://pubmed.ncbi.nlm.nih.gov/26270610/)
2. Gold E, Carver DH, Heineberg H, Adelson L, Robbins FC. Viral infection: A possible cause of sudden, unexpected death in infants. *N Engl J Med.* 1961; 264:53–60.
3. Guntheroth WG, Lohmann R, Spiers PS. A seasonal association between SIDS deaths and kindergarten absences. *Public Health Rep.* 1992; 107:319. PMID: [1594742](https://pubmed.ncbi.nlm.nih.gov/1594742/)
4. Alfelali M, Khandaker G. Infectious causes of sudden infant death syndrome. *Paediatr Respir Rev.* 2014; 15:307–311. <https://doi.org/10.1016/j.prrv.2014.09.004> PMID: [25441371](https://pubmed.ncbi.nlm.nih.gov/25441371/)
5. Schwemberger R, Steele RW. Neonates Born to Chlamydia-Positive Mothers. *Clin Pediatr (Phila)* 2017; 56:1277–1279. <https://doi.org/10.1177/0009922817732151> PMID: [28929792](https://pubmed.ncbi.nlm.nih.gov/28929792/)
6. Hillman LS, Gardner M. 1023 Chlamydia trachomatis seropositivity in sudden infant death syndrome cases (SIDS) and controls. *Pediatr Res* 1981; 15 (Suppl 4), 613 (Abstract). <https://doi.org/10.1203/00006450-198104001-01049>.
7. Rours GJJ, Duijts L, Moll HA, Arends LR, de Groot R, Jaddoe VW, et al. Chlamydia trachomatis infection during pregnancy associated with preterm delivery: a population-based prospective cohort study. *Eur J Epidemiol.* 2011; 26:493–502. <https://doi.org/10.1007/s10654-011-9586-1> PMID: [21538042](https://pubmed.ncbi.nlm.nih.gov/21538042/)
8. Gencay M; Koskiniemi M; Ammala P; Fellman V; Narvanen A; Wahlstrom, et al. Chlamydia trachomatis seropositivity is associated both with stillbirth and preterm delivery. *APMIS.* 2000; 108:584–588. <https://doi.org/10.1034/j.1600-0463.2000.d01-101.x> PMID: [11110046](https://pubmed.ncbi.nlm.nih.gov/11110046/)
9. Harrison HR, Alexander ER, Weinstein L, Lewis M, Nash M, Sim DA. Cervical Chlamydia trachomatis and mycoplasmal infections in pregnancy: epidemiology and outcomes. *JAMA.* 1983; 250(13):1721–1727.
10. Sweet RL, Landers DV, Walker C, Schachter J. Chlamydia trachomatis infection and pregnancy outcome. *Am J Obstet Gynecol.* 1987; 156(4):824–833. [https://doi.org/10.1016/0002-9378\(87\)90338-3](https://doi.org/10.1016/0002-9378(87)90338-3) PMID: [3107388](https://pubmed.ncbi.nlm.nih.gov/3107388/)
11. Lundemose JB, Lundemose AG, Gregersen M, Helweg-Larsen K, Simonsen J. Chlamydia and sudden infant death syndrome. A study of 166 SIDS and 30 control cases. *Int J Legal Med.* 1990; 104(1):3–7. <https://doi.org/10.1007/BF01816475> PMID: [11453089](https://pubmed.ncbi.nlm.nih.gov/11453089/)
12. von Elm E, Altman DG, Egger M, Pocock SJ, Gøtzsche PC, Vandenbroucke JP, et al. The Strengthening the Reporting of Observational Studies in Epidemiology (STROBE) Statement: Guidelines for reporting observational studies. *PLoS Med* 2007; 4(10): e296. <https://doi.org/10.1371/journal.pmed.0040296> PMID: [17941714](https://pubmed.ncbi.nlm.nih.gov/17941714/)
13. Centers for Disease Control and Prevention, National Center for Health Statistics. Vital statistics online data portal: cohort linked birth-infant death data files. Available at: [www.cdc.gov/nchs/data\\_access/Vitalstatsonline.htm](http://www.cdc.gov/nchs/data_access/Vitalstatsonline.htm).
14. Lavista Ferres JM, Anderson TM, Johnston R, Ramirez J-M, Mitchell EA. Distinct Populations of Sudden Unexpected Infant Death Based on Age. *Pediatrics* 2020; 145(1) e20191637; <https://doi.org/10.1542/peds.2019-1637> PMID: [31818863](https://pubmed.ncbi.nlm.nih.gov/31818863/)
15. Hoffman HJ, Damus K, Hillman L, Krongrad E. Risk Factors for SIDS. Results of the National Institute of Child Health and Human Development SIDS Cooperative Epidemiological Study. *Ann N Y Acad Sci* 1988; 533: 13–30. <https://doi.org/10.1111/j.1749-6632.1988.tb37230.x> PMID: [3048169](https://pubmed.ncbi.nlm.nih.gov/3048169/)

16. Anderson TM, Lavista Ferres JM, Ren SY, Moon RY, Goldstein RD, Ramirez JM, et al. Maternal smoking before and during pregnancy and the risk of sudden unexpected infant death. *Pediatrics* 2019; 2019; 143(4):e20183325 <https://doi.org/10.1542/peds.2018-3325> PMID: 30858347
17. Whittemore AS. Estimating attributable risk for case-control studies. *Am J Epidemiol* 1983; 117: 76–85.
18. Ghamar Chehreh ME, Tabatabaei SV, Khazanehdari S, Alavian SM. Effect of cesarean section on the risk of perinatal transmission of hepatitis C virus from HCV-RNA+/HIV- mothers: a meta-analysis. *Arch Gynecol Obstet*. 2011 Feb; 283(2):255–60. <https://doi.org/10.1007/s00404-010-1588-9> PMID: 20652289
19. Mitchell CM, Mazzoni C, Hogstrom L, Bryant A, Bergerat A, Cher A, et al. Delivery Mode Affects Stability of Early Infant Gut Microbiota. *Cell Rep Med*. 2020 Dec 22; 1(9):100156. <https://doi.org/10.1016/j.xcrm.2020.100156> PMID: 33377127
20. Paige DM, Augustyn M, Adih WK, Witter F, Chang J. Bacterial Vaginosis and Preterm Birth: A Comprehensive Review of the Literature. *J Nurse Midwifery*. 1998; 43(2):83–89. [https://doi.org/10.1016/s0091-2182\(97\)00161-4](https://doi.org/10.1016/s0091-2182(97)00161-4) PMID: 9581092
